# Supplementary material for: The AIE-active flavonoids in orange peel for photocatalytic oxidation reactions
Source: Royal Society of Chemistry journal article supplement (doi:10.1039/d5gc06463e), 2026-01-01
Supplement: d5gc06463e1.pdf [file d5gc06463e1.pdf]

## *Supporting Information*

### **The AIE-Active Flavonoids in Orange Peel for Photocatalytic Oxidation Reactions**

*Zhuxin Li,<sup>a</sup> Junfei Zhang,<sup>a</sup> Chong Li,<sup>b</sup> Jinzhe Cao,<sup>\*a</sup> and Shengyang Tao,<sup>\*a</sup>*

<sup>a</sup> Dalian University of Technology. No.2 Linggong Road, Dalian, Liaoning, China.

<sup>b</sup> Xi'an Modern Chemistry Research Institute, Xi'an 710065, China.

Email: taosy@dlut.edu.cn

## Table of Contents

|                                                                       |    |
|-----------------------------------------------------------------------|----|
| I. General Information .....                                          | 3  |
| II. HPLC Chromatogram of Three Flavonoid Standards .....              | 4  |
| III. High-Resolution Liquid Chromatography Mass Spectrometry<br>..... | 7  |
| IV. Verification of AIE Properties.....                               | 11 |
| V. Cyclic Voltammetry Diagram .....                                   | 12 |
| VI. Physical and Fluorescent Properties of Nanoparticles .....        | 13 |
| VII. Comparison of Catalytic Performance .....                        | 15 |
| VIII. Catalyst Cycling Experiment .....                               | 16 |
| IX. Green Metrics .....                                               | 17 |
| X. Characterization Data of Compounds .....                           | 18 |
| XI. The NMR Spectra of Compounds .....                                | 21 |

## I. General Information

All chromatographic analyses for both the extracts and standards were acquired using an Agilent 1260 Infinity II HPLC system equipped with a Sunfire™ C18 column maintained at 25 °C. The selected analytical method was as follows: the mobile phase consisted of acetonitrile (A) and water (B) employing a gradient elution program: 35% A (0-15 min), 55% A (15-20 min), 100% A (20-35 min). The injection volume was 20  $\mu$ L, the flow rate was 1.0 mL·min<sup>-1</sup>, and the detection wavelength was set at 280 nm. Each standard compound (tangeretin, nobiletin, sinensetin; 1.0 mg each) was dissolved in 1.0 mL of methanol to form stock solutions, which were filtered through a 0.22  $\mu$ m micropore filter prior to analysis.

Magnetic resonance spectra (<sup>1</sup>H NMR and <sup>13</sup>C NMR) were recorded on Bruker ACF 400 MHz or 600 MHz with CDCl<sub>3</sub> as the solvent, and chemical shifts were internally referenced to TMS and residual portion solvent signals (note: TMS referenced at 0.00 ppm; CDCl<sub>3</sub> referenced at 7.26 and 77.0 ppm, respectively). Data are shown as follows: chemical shifts ( $\delta$  ppm), multiplicity (s = singlet, d = doublet, t = triplet, q = quartet, quint = quintet, sext = sextet, h = heptet, m = multiplet, dd = doublet of doublets, dt = doublet of triplets, br = broad), coupling constant (J Hz). Commercially available reagents and solvents were purchased from Adamas and Aladdin, and used as received unless otherwise specified. High-resolution mass spectra (HRMS) were obtained using a Q Exactive Plus (Thermo Fisher Scientific), which utilizes advanced quadrupole technology (AQT) and MassWorks software for matching. The resulting data is in terms of mass-to-charge ratio (m/z) units.

## II. HPLC Chromatogram of Three Flavonoid Standards

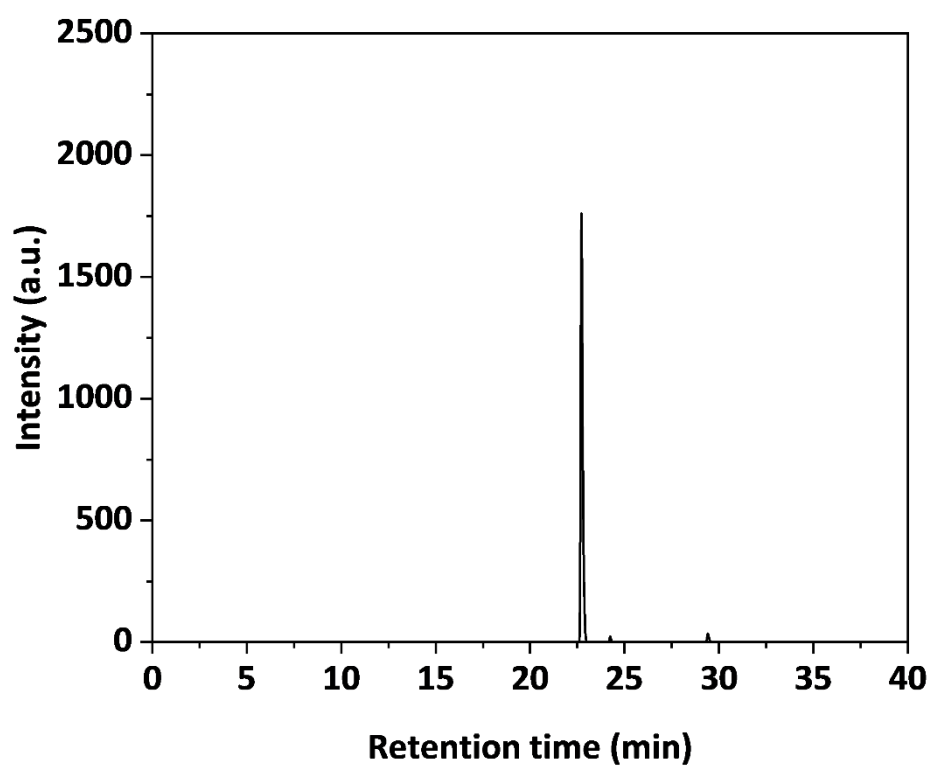

Fig.S1 HPLC chromatogram of Tangeretin.

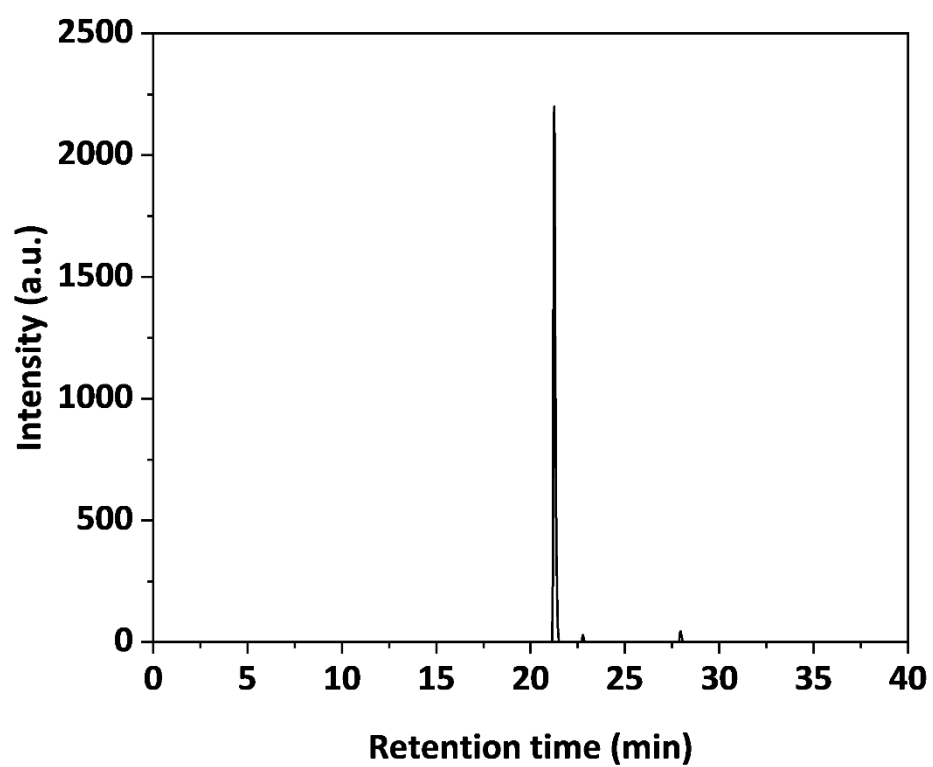

Fig.S2 HPLC chromatogram of Nobiletin.

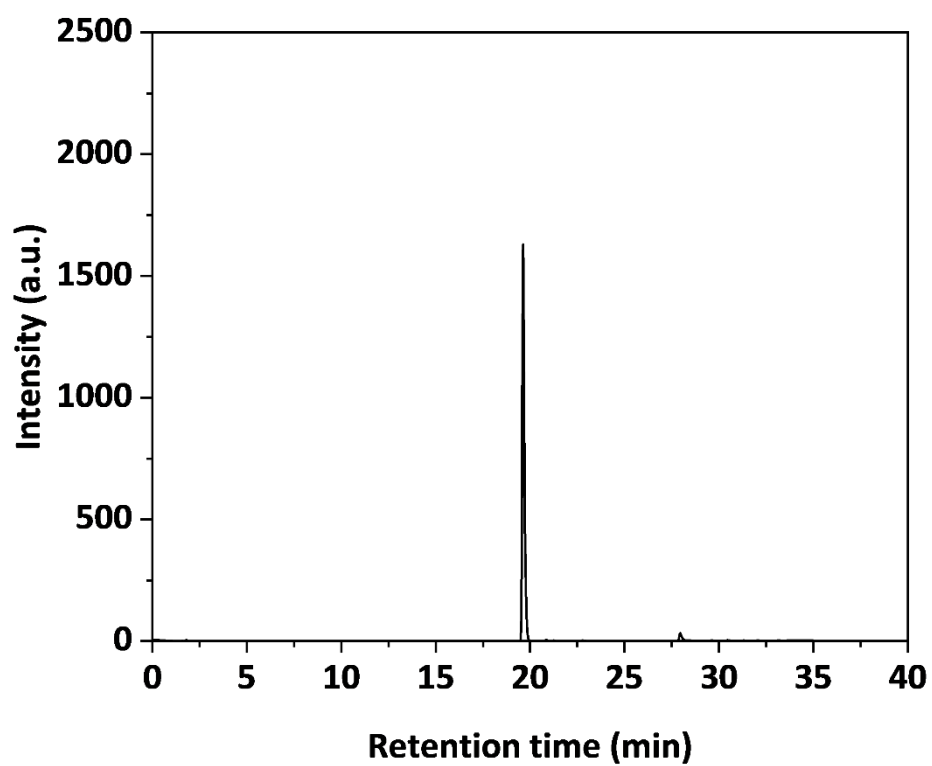

Fig.S3 HPLC chromatogram of Sinensetin.

**Table S1** Comparison of the retention time of cellulite extract and three reference materials.

| Extracts | RT (s) | RM         | RT (s) |
|----------|--------|------------|--------|
| 1        | 19.79  | Sinensetin | 19.62  |
| 2        | 21.39  | Nobiletin  | 21.24  |
| 3        | 22.94  | Tangeretin | 22.71  |

### III. High-Resolution Liquid Chromatography Mass Spectrometry

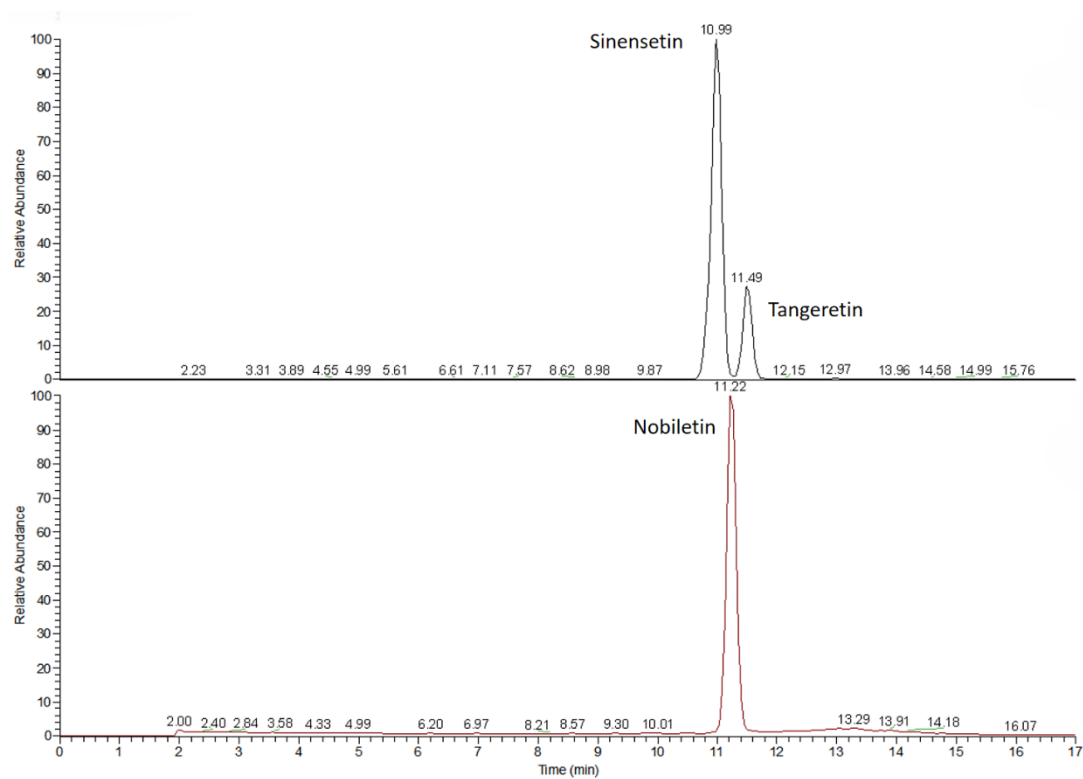

Fig.S4 HPLC chromatogram of orange peel extract.

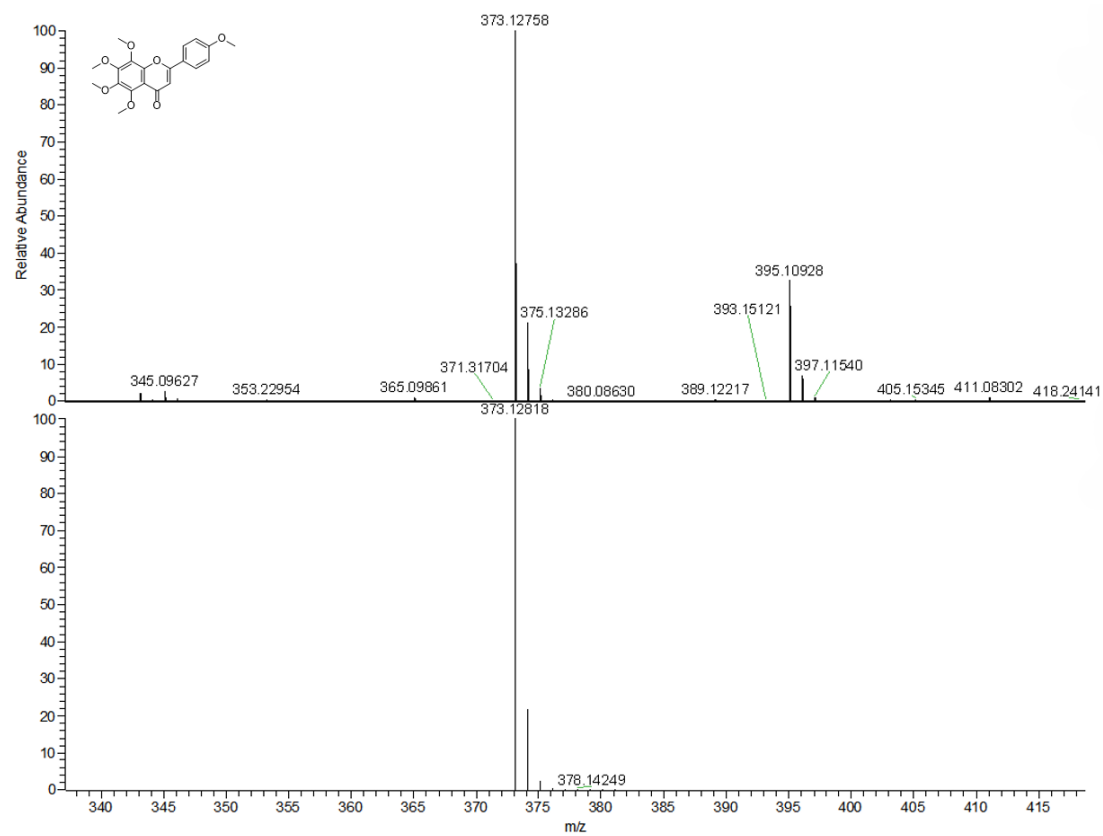

Fig.S5 Mass spectrum of Tangeretin.



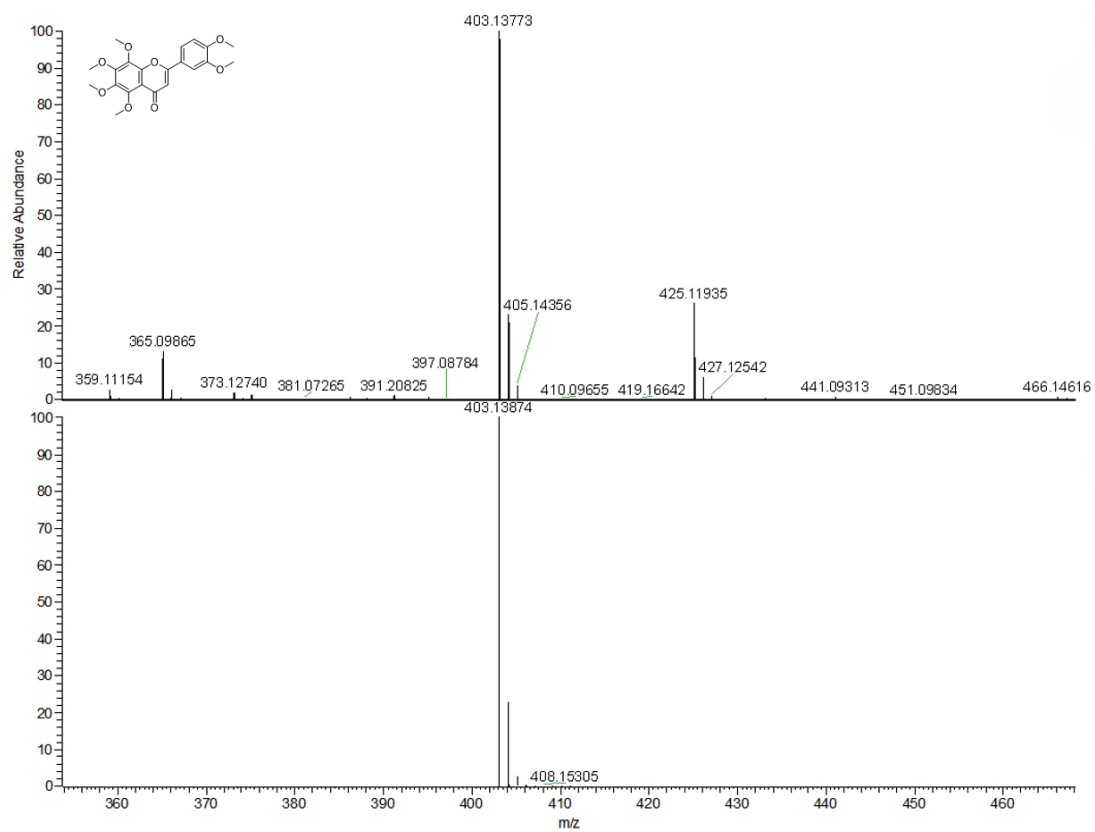

Fig.S6 Mass spectrum of Nobiletin.

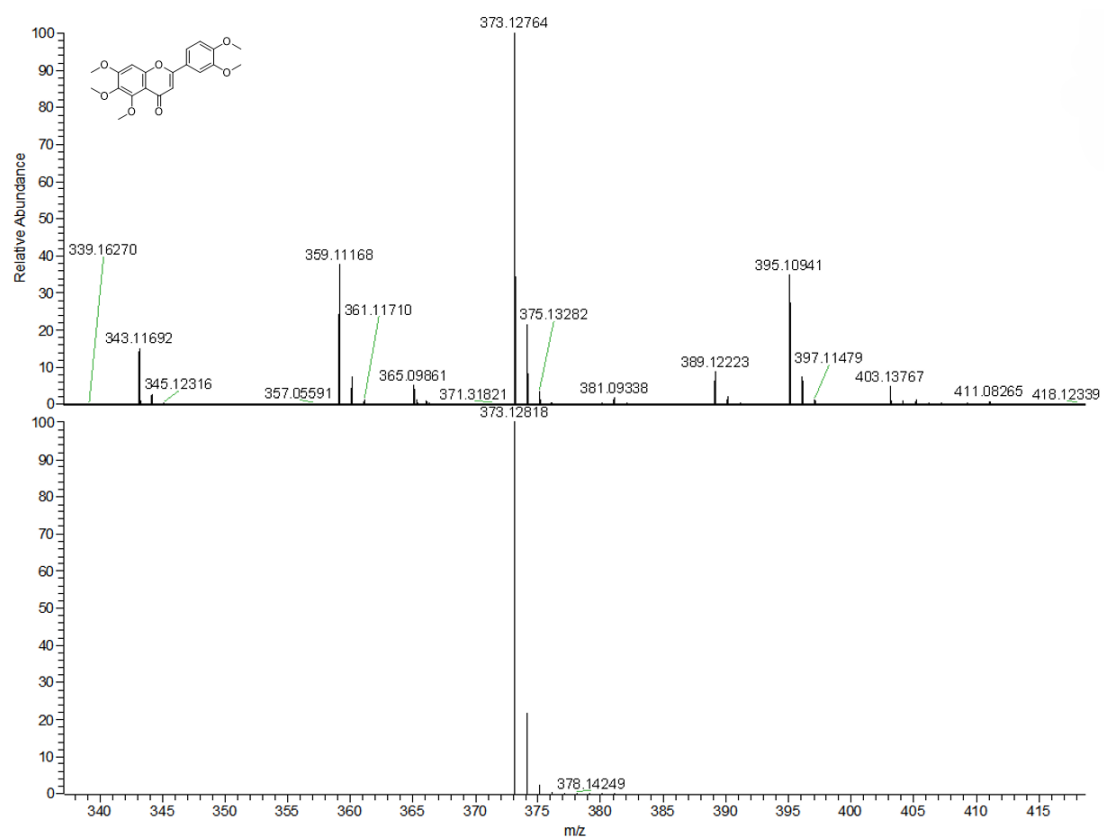

Fig.S7 Mass spectrum of Sinensetin.

## IV. Verification of AIE Properties

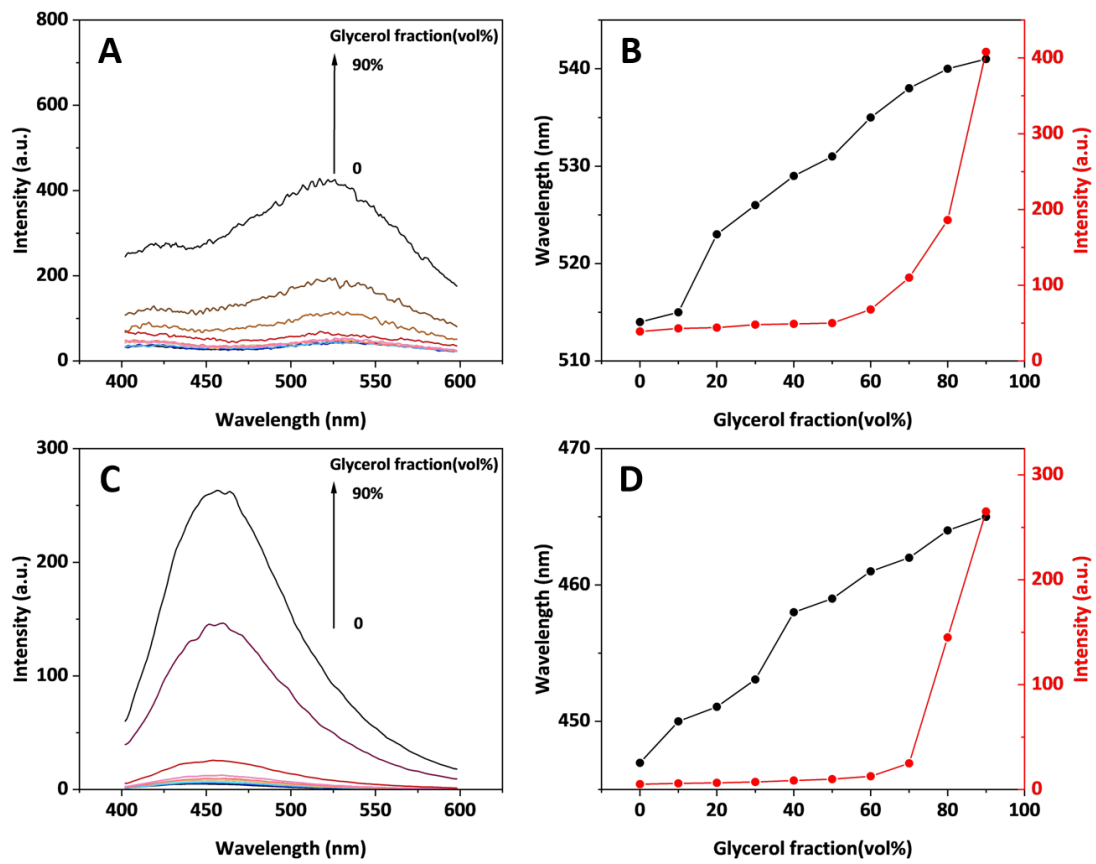

Fig.S8 Experiment on viscosity changes of Tangeretin(A,B), Nobiletin(C,D).

## V.Cyclic Voltammetry Diagram

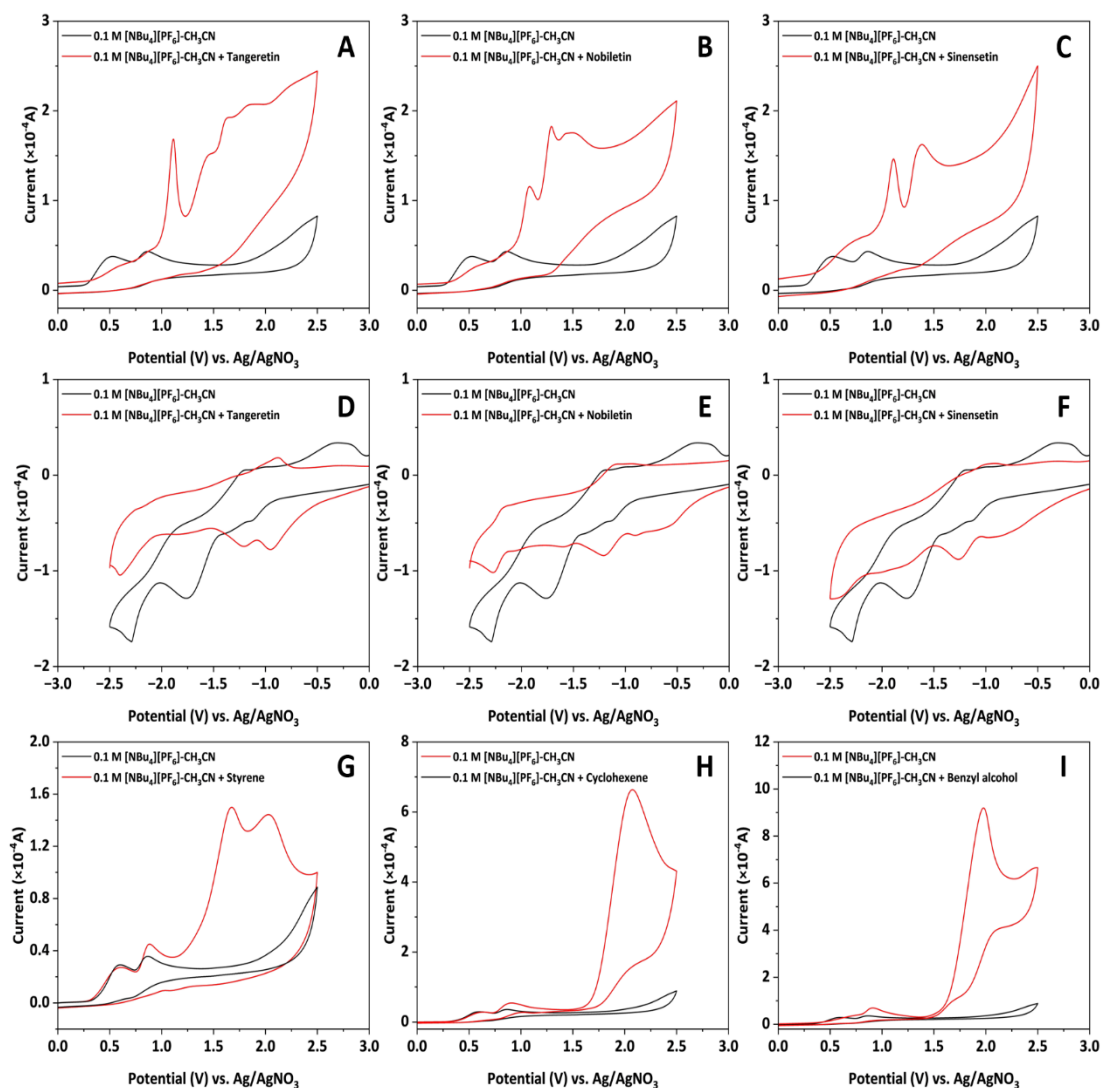

**Fig.S9** Cyclic voltammograms of the three flavonoid compounds and all reaction substrates. A standard three-electrode configuration was employed for all experiments in an acetonitrile-based system: a glassy carbon working electrode, a platinum wire counter electrode, and an Ag/AgNO<sub>3</sub> reference electrode. The scan rate was set at 0.2 V/s over a potential range of -2.5 V to +2.5 V. To ensure sufficient conductivity, 0.1 M tetrabutylammonium hexafluorophosphate ([NBu<sub>4</sub>][PF<sub>6</sub>]) in acetonitrile was added as the supporting electrolyte.

**Table S2** The half-wave oxidation potentials of all reaction substrates.

|                  | Styrene | Cyclohexene | Benzyl alcohol |
|------------------|---------|-------------|----------------|
| $E_{p/2}^{ox}/V$ | 1.45    | 1.86        | 1.79           |

## VI. Physical and Fluorescent Properties of Nanoparticles

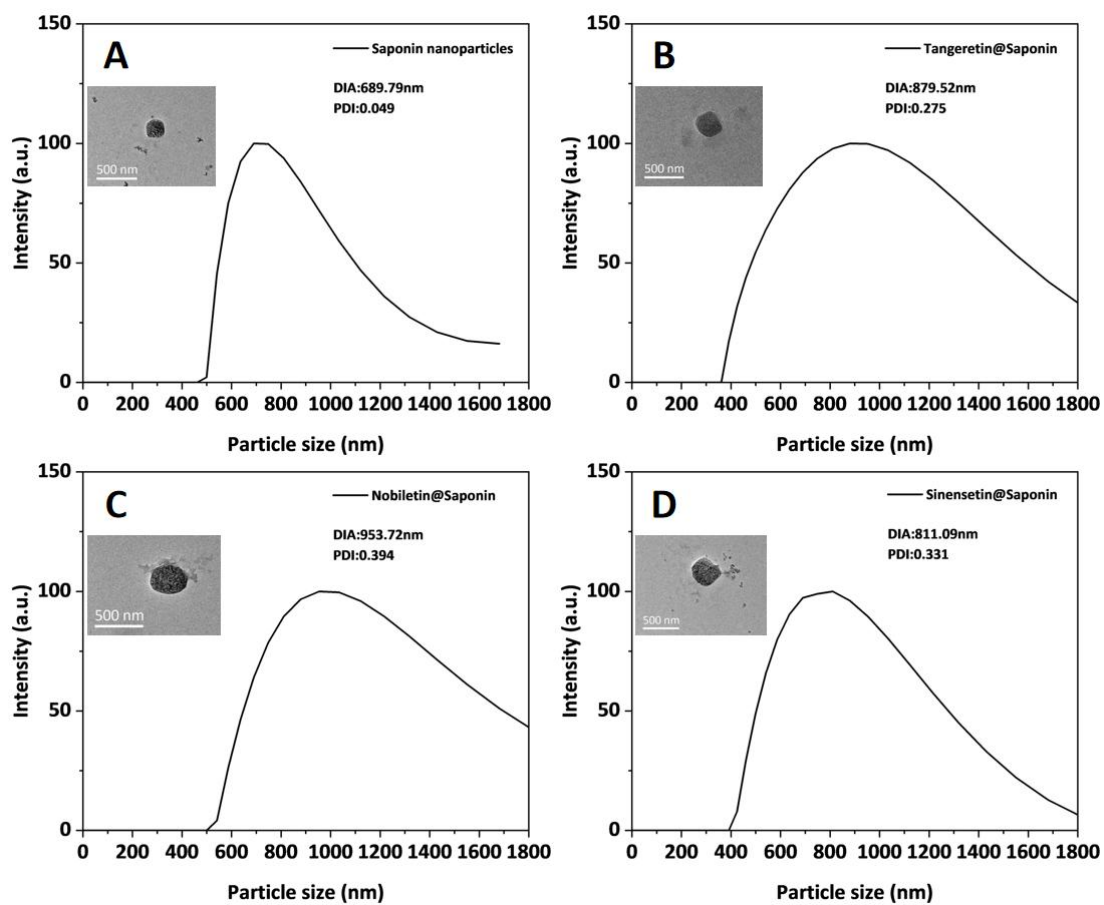

Fig.S10 Particle size distribution diagram and particle morphology. Pure saponin Nanoparticles (A). Photocatalyst @ Saponin Nanoparticles(B,C,D).Inset: TEM images for both nanoparticles. Scale bar=500nm.

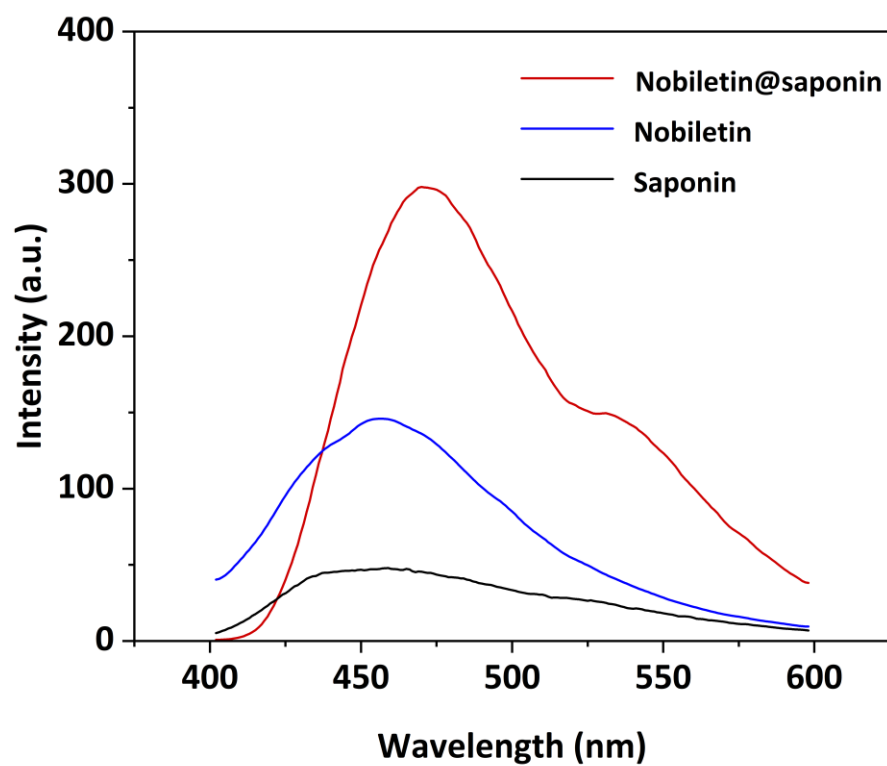

Fig.S11 Fluorescence emission spectra of Nobiletin, Saponin, and Nobiletin@saponin nanoparticles.

## VII. Comparison of Catalytic Performance

Table S3 Comparison of Catalytic Performance.

| Entry | Photocatalysts                     | Time (h) | Conv. (%) |
|-------|------------------------------------|----------|-----------|
| 1     | Tangeretin                         | 16       | 62.9      |
| 2     | Nobiletin                          | 16       | 86.0      |
| 3     | Sinensetin                         | 16       | 65.5      |
| 4     | Mo-SIM <sup>38</sup>               | 7        | 93.0      |
| 5     | Mo-ZrO <sub>2</sub> <sup>38</sup>  | 7        | 97.0      |
| 6     | Ti <sub>12</sub> PTA <sup>39</sup> | 8        | 100.0     |
| 7     | AuNP <sup>40</sup>                 | 3        | 28.3      |

38 H. Noh, Y. Cui, A. W. Peters, *J. Am. Chem. Soc.*, 2016, **138**, 14720-14726.

39 H. Yu, X. Wang and T. Kong, *Chem. Commun.*, 2024, **60**, 15051-15054.

40 V. P. Chauke, Y. Arslanoglu, T. Nyokong, *J. Photochem. Photobiol., A*, 2011, **221**, 38-46.

## VIII. Catalyst Cycling Experiment

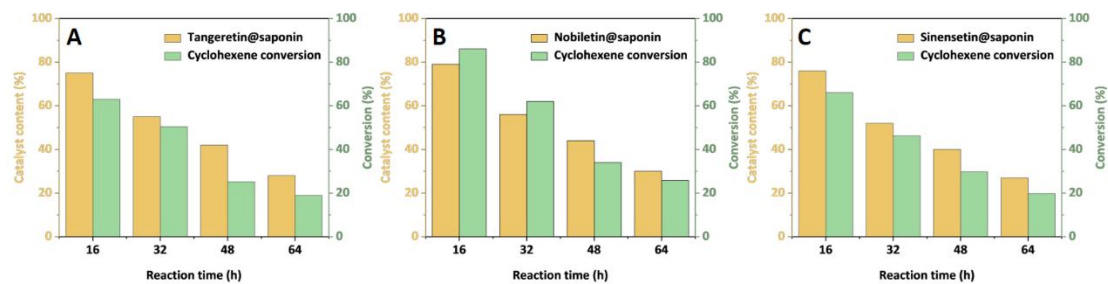

Fig.S12 Catalyst Cycling Experiment. Tangeretin(A). Nobiletin(B). Sinensetin(C).



## IX. Green Metrics

**Table S4** Key Green Metrics for the Photo-oxidation of Benzyl Alcohol.

| Substrate      | Solvent          | Photocatalysts | Yield (%) | AE (%) | E factor | Solvent contribution (%) |
|----------------|------------------|----------------|-----------|--------|----------|--------------------------|
| Benzyl alcohol | H <sub>2</sub> O | Tangeretin     | 43.5      | 85     | 2.36     | 0                        |
| Benzyl alcohol | H <sub>2</sub> O | Nobiletin      | 52.4      | 85     | 1.79     | 0                        |
| Benzyl alcohol | H <sub>2</sub> O | Sinensetin     | 42.5      | 85     | 2.45     | 0                        |

## X.Characterization Data of Compounds

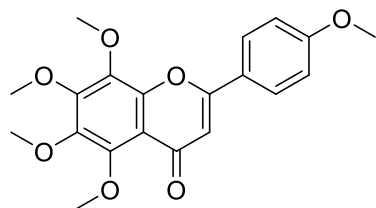

**Tangeretin.** Following the general procedure to afford the product. EtOAc/PE (1:1) as the eluent,  $R_f=0.4$ .  $^1\text{H}$  NMR (600 MHz, Chloroform- $d$ )  $\delta$  7.88 (d,  $J=7.9$  Hz, 1H), 7.02 (d,  $J=8.7$  Hz, 1H), 6.61 (s, 1H), 4.11 – 4.09 (m, 1H), 4.02 (d,  $J=1.0$  Hz, 1H), 3.94 (d,  $J=0.9$  Hz, 3H), 3.88 (d,  $J=1.0$  Hz, 1H).  $^{13}\text{C}$  NMR (151 MHz, Chloroform- $d$ )  $\delta$  177.44, 162.31, 161.26, 151.41, 148.40, 147.75, 144.10, 144.09, 138.08, 127.76, 127.74, 123.80, 114.53, 106.65, 106.60, 62.27, 62.05, 61.84, 61.67, 55.51. HRMS  $m/z$ : (ESI) calculated for  $[\text{M}+\text{H}]^+$   $\text{C}_{20}\text{H}_{20}\text{O}_7$ : 373.1281, found: 373.1276.

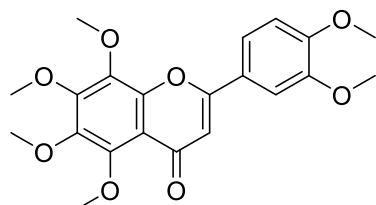

**Nobiletin.** Following the general procedure to afford the product. EtOAc/PE (1:1) as the eluent,  $R_f=0.3$ .  $^1\text{H}$  NMR (600 MHz, Chloroform- $d$ )  $\delta$  7.56 (dd,  $J=8.4, 2.1$  Hz, 1H), 7.41 (d,  $J=2.1$  Hz, 1H), 6.99 (d,  $J=8.5$  Hz, 1H), 6.61 (s, 1H), 4.10 (s, 3H), 4.02 (s, 3H), 3.99 – 3.93 (m, 12H).  $^{13}\text{C}$  NMR (151 MHz, Chloroform- $d$ )  $\delta$  177.36, 161.04, 151.94, 151.43, 149.30, 148.43, 147.73, 144.10, 138.02, 124.02, 119.63, 114.87, 111.23, 108.56, 106.89, 62.27, 61.97, 61.84, 61.69, 56.10, 55.98. HRMS  $m/z$ : (ESI) calculated for  $[\text{M}+\text{H}]^+$   $\text{C}_{21}\text{H}_{22}\text{O}_8$ : 403.1387, found: 403.1377.

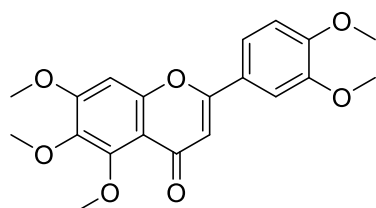

**Sinensetin.** Following the general procedure to afford the product. EtOAc/PE (1:1) as the eluent,  $R_f=0.2$ .  $^1\text{H}$  NMR (600 MHz, Chloroform- $d$ )  $\delta$  7.51 (dd,  $J=8.5, 2.1$  Hz, 1H), 7.33 (d,  $J=2.2$  Hz, 1H), 6.97 (d,  $J=8.4$  Hz, 1H), 6.80 (s, 1H), 6.59 (s, 1H), 3.99 (s, 5H), 3.98 (s, 3H), 3.96 (s, 3H), 3.92 (s, 3H).  $^{13}\text{C}$  NMR (151 MHz, Chloroform- $d$ )  $\delta$  177.21, 161.14, 157.66, 154.54, 154.51, 152.60, 151.86, 151.81, 149.28, 140.36, 124.13, 119.64, 119.59, 112.89, 111.13, 108.67, 108.65, 107.42, 107.28, 96.26, 62.21, 61.56, 56.34, 56.32, 56.14, 56.09. HRMS  $m/z$ : (ESI) calculated for  $[\text{M}+\text{H}]^+$   $\text{C}_{20}\text{H}_{20}\text{O}_7$ : 373.1281, found: 373.1275.

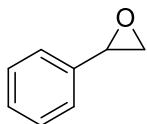

**Styrene oxide(1).** Following the general procedure to afford product **1** (12.6% yield). EtOAc/PE (1:20) as the eluent,  $R_f=0.7$ .  $^1\text{H}$  NMR (600 MHz, Chloroform- $d$ )  $\delta$  7.37 – 7.27 (m, 5H), 3.89 – 3.85 (m, 1H), 3.18 – 3.13 (m, 1H), 2.81 (dd,  $J$  = 5.5, 2.6 Hz, 1H).  $^{13}\text{C}$  NMR (151 MHz, Chloroform- $d$ )  $\delta$  137.59, 128.51, 128.20, 125.50, 52.38, 51.23. HRMS  $m/z$ : (ESI) calculated for  $[\text{M}+\text{H}]^+$   $\text{C}_8\text{H}_9\text{O}$ : 121.0648, found: 121.0645.

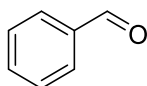

**Benzaldehyde(2).** Following the general procedure to afford product **2** (41.1% yield). EtOAc/PE (1:20) as the eluent,  $R_f=0.5$ .  $^1\text{H}$  NMR (600 MHz, Chloroform- $d$ )  $\delta$  10.03 (s, 1H), 7.89 (dd,  $J$  = 8.1, 1.4 Hz, 2H), 7.63 (dtd,  $J$  = 12.5, 7.3, 1.3 Hz, 1H), 7.54 (t,  $J$  = 7.7 Hz, 2H).  $^{13}\text{C}$  NMR (151 MHz, Chloroform- $d$ )  $\delta$  192.45, 136.42, 134.49, 130.21, 129.77, 129.02, 128.50. HRMS  $m/z$ : (ESI) calculated for  $[\text{M}+\text{H}]^+$   $\text{C}_7\text{H}_7\text{O}$ : 107.0491, found: 107.0489.

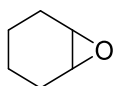

**Cyclohexene oxide(3).** Following the general procedure to afford product **3** (8.6% yield). EtOAc/PE (1:20) as the eluent.  $^1\text{H}$  NMR (600 MHz, Chloroform- $d$ )  $\delta$  3.12 (d,  $J$  = 2.5 Hz, 1H), 1.95 (dt,  $J$  = 15.2, 6.3 Hz, 1H), 1.86 – 1.75 (m, 1H), 1.42 (tt,  $J$  = 9.2, 3.7 Hz, 1H), 1.29 – 1.15 (m, 1H).  $^{13}\text{C}$  NMR (151 MHz, Chloroform- $d$ )  $\delta$  52.16, 24.44, 19.44. HRMS  $m/z$ : (ESI) calculated for  $[\text{M}+\text{H}]^+$   $\text{C}_6\text{H}_{11}\text{O}$ : 99.0804, found: 99.0802.

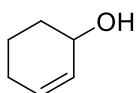

**2-cyclohexen-1-ol(4).** Following the general procedure to afford product **4** (28.9% yield). EtOAc/PE (1:20) as the eluent,  $R_f=0.3$ .  $^1\text{H}$  NMR (600 MHz,  $\text{CDCl}_3$ )  $\delta$  5.85 – 5.80 (m, 1H), 5.75 (m, 1H), 4.19 (s, 1H), 2.08 – 2.01 (m, 1H), 1.99 – 1.93 (m, 1H), 1.91 – 1.84 (m, 1H), 1.78 – 1.69 (m, 1H), 1.60 (m, 3H).  $^{13}\text{C}$  NMR (151 MHz, Chloroform- $d$ )  $\delta$  130.64, 129.82, 65.52, 32.00, 25.05, 18.92. HRMS  $m/z$ : (ESI) calculated for  $[\text{M}+\text{H}]^+$   $\text{C}_6\text{H}_{11}\text{O}$ : 99.0804, found: 99.0803.

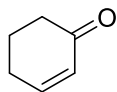

**2-Cyclohexen-1-one(5).** Following the general procedure to afford product **5** (28.6% yield). EtOAc/PE (1:20) as the eluent,  $R_f=0.5$ .  $^1\text{H}$  NMR (600 MHz, Chloroform- $d$ )  $\delta$  6.99 (dt,  $J$  = 9.8, 4.1 Hz, 1H), 6.02 (dt,  $J$  = 10.1, 2.1 Hz, 1H), 2.46 – 2.40 (m, 2H), 2.35 (tdd,  $J$  = 6.1, 4.1, 2.1 Hz, 2H), 2.06 – 1.98 (m, 2H).  $^{13}\text{C}$  NMR (151 MHz, Chloroform- $d$ )  $\delta$  199.80, 150.69, 129.96, 38.12, 25.69, 22.74. HRMS  $m/z$ : (ESI) calculated for  $[\text{M}+\text{H}]^+$   $\text{C}_6\text{H}_9\text{O}$ : 97.0648, found: 97.0645.

## XI.The NMR Spectra of Compounds

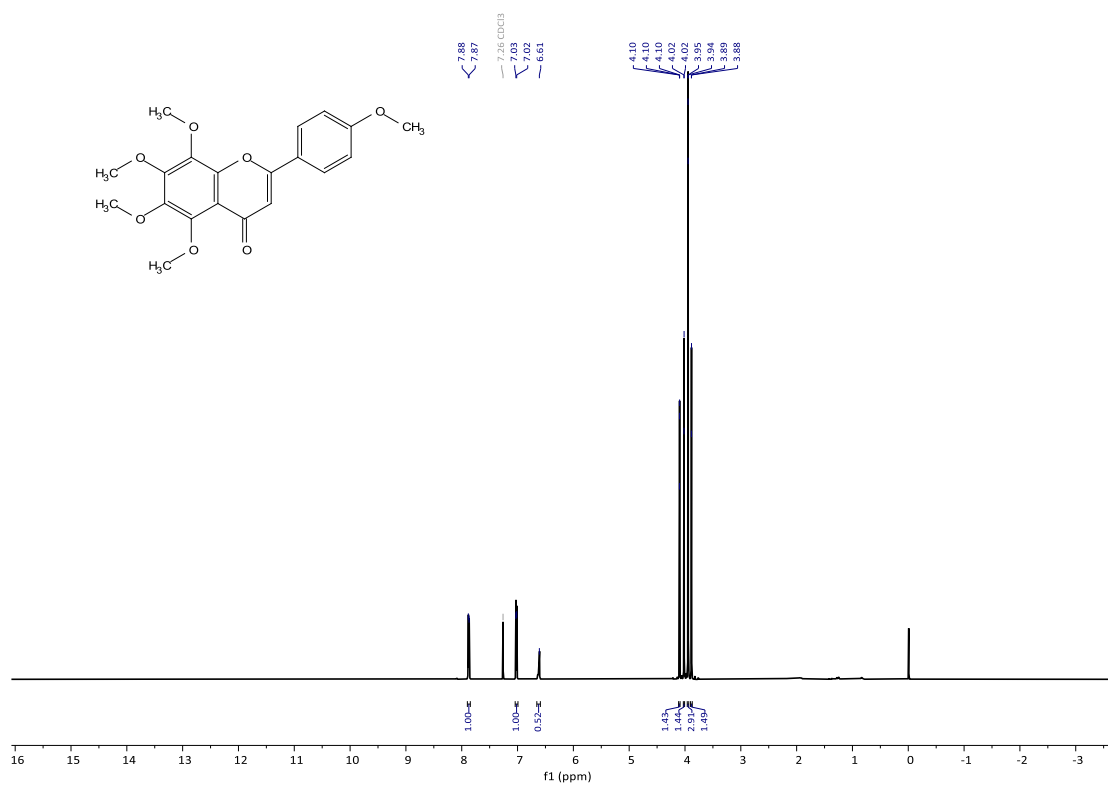

<sup>1</sup>H NMR spectrum of compound Tangeretin (600 MHz, CDCl<sub>3</sub>).

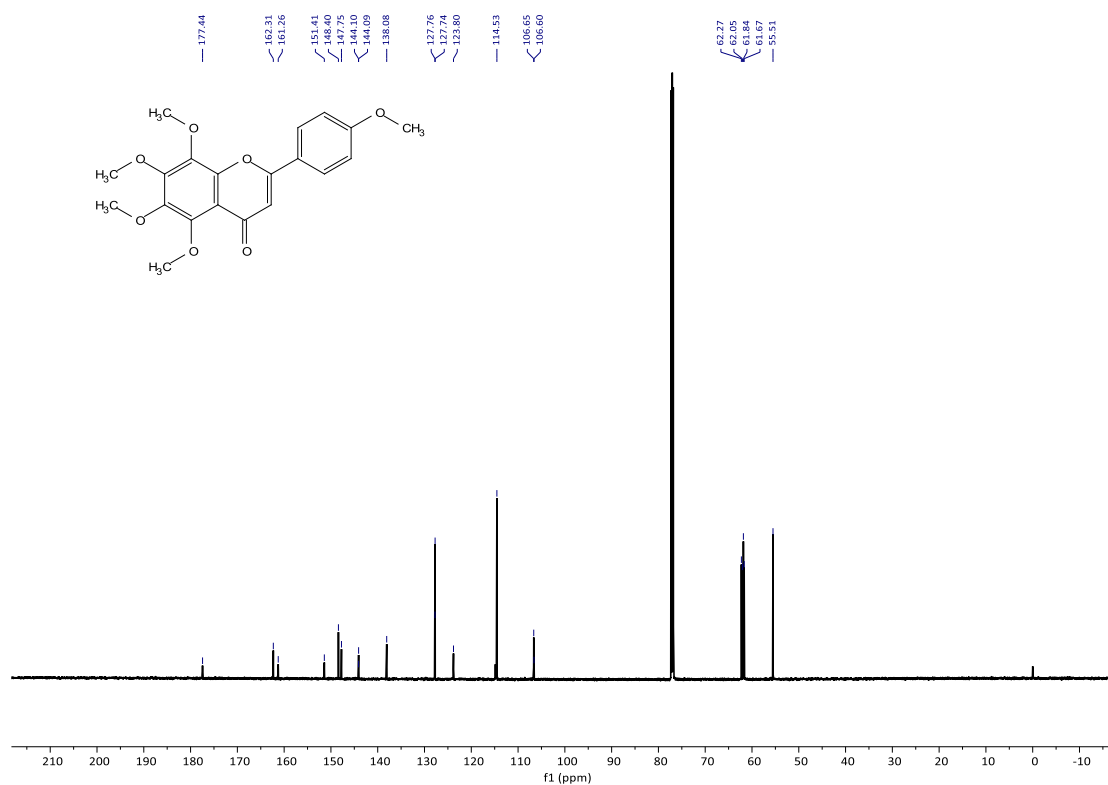

<sup>13</sup>C NMR spectrum of compound Tangeretin (151 MHz, CDCl<sub>3</sub>).



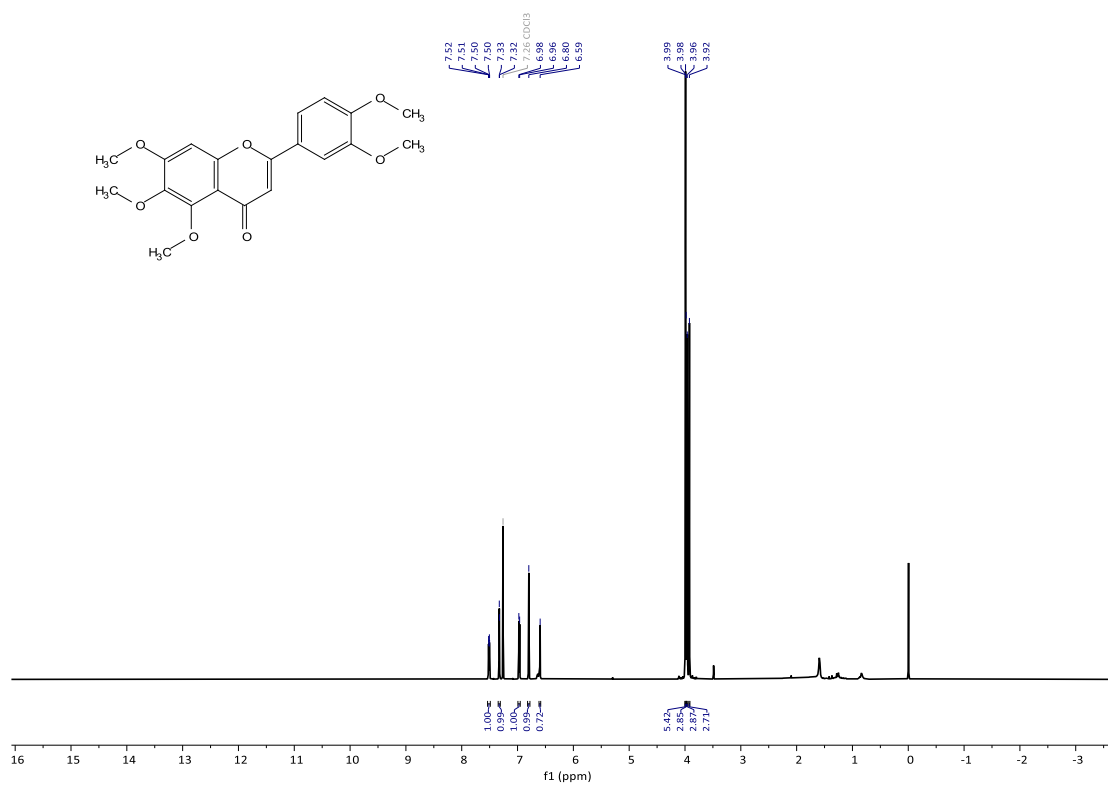

<sup>1</sup>H NMR spectrum of compound Sinensetin (600 MHz, CDCl<sub>3</sub>).

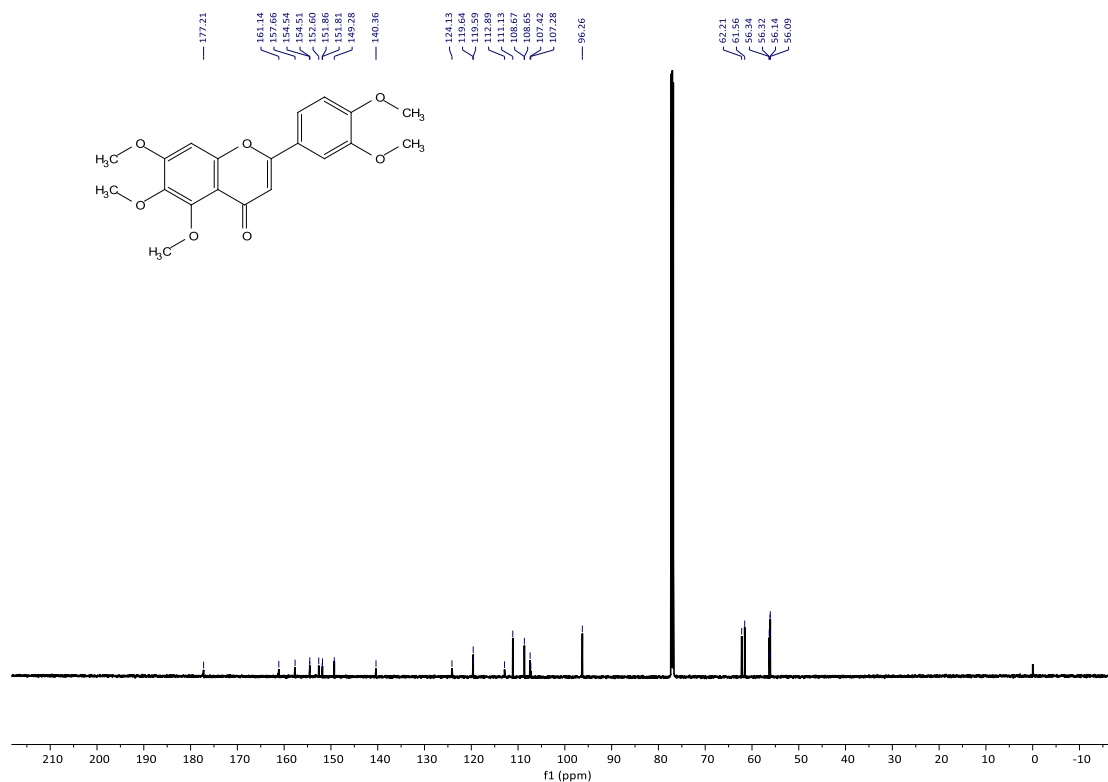

<sup>13</sup>C NMR spectrum of compound Sinensetin (151 MHz, CDCl<sub>3</sub>).

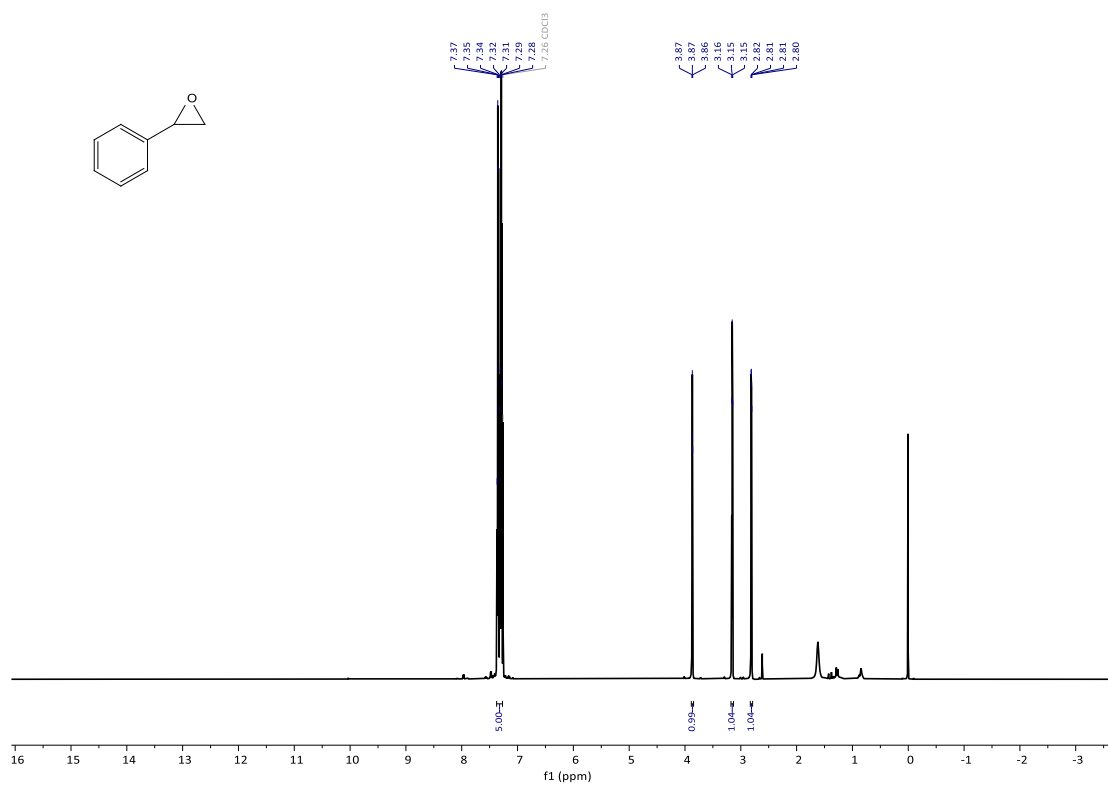

<sup>1</sup>H NMR spectrum of compound 1 (600 MHz, CDCl<sub>3</sub>).

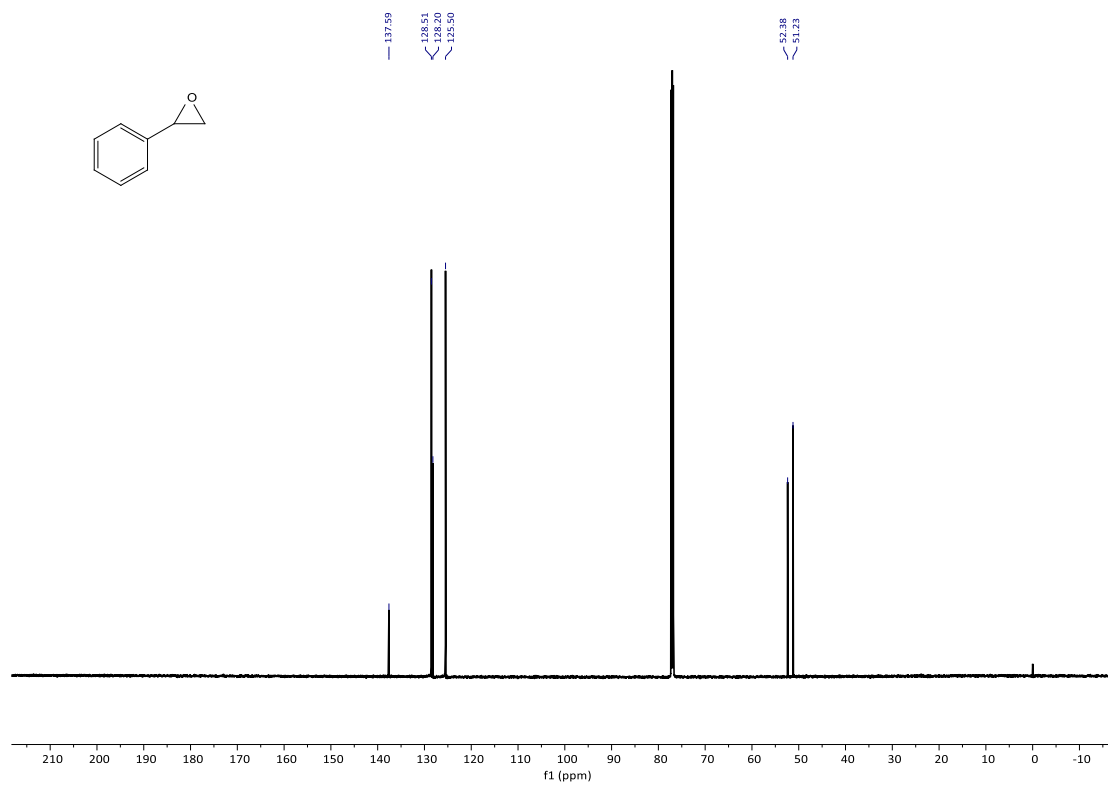

<sup>13</sup>C NMR spectrum of compound 1 (151 MHz, CDCl<sub>3</sub>).



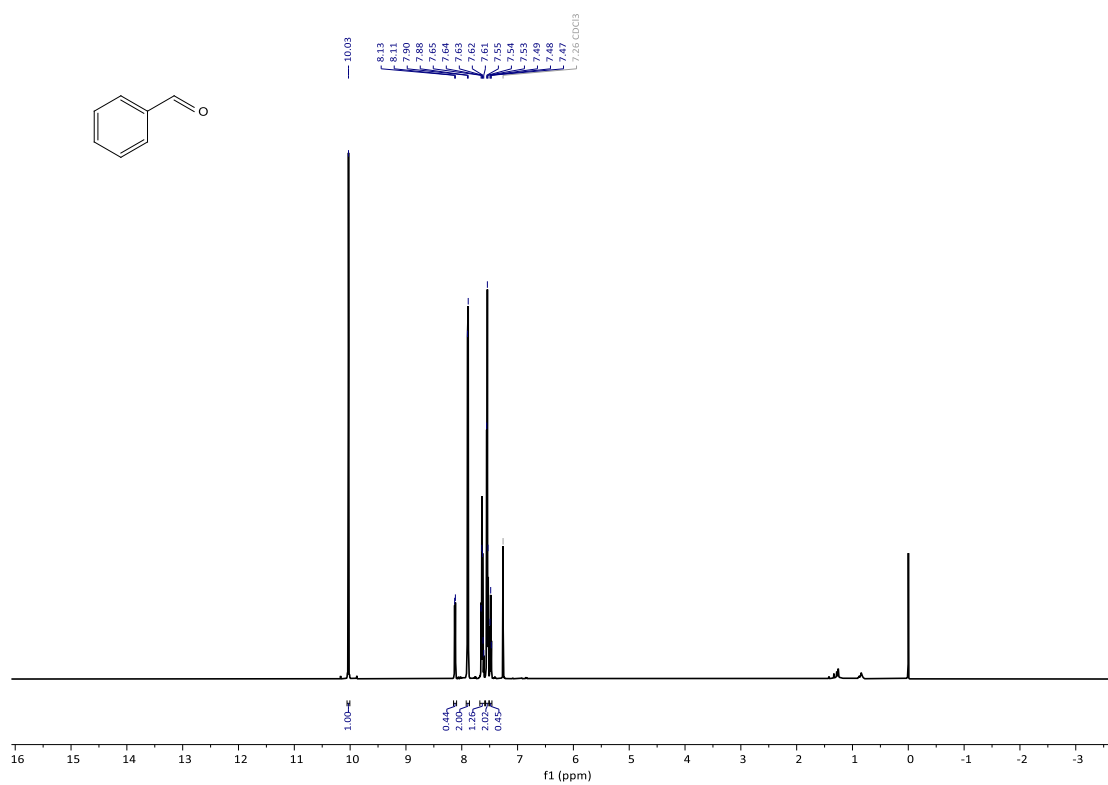

<sup>1</sup>H NMR spectrum of compound 2 (600 MHz, CDCl<sub>3</sub>).

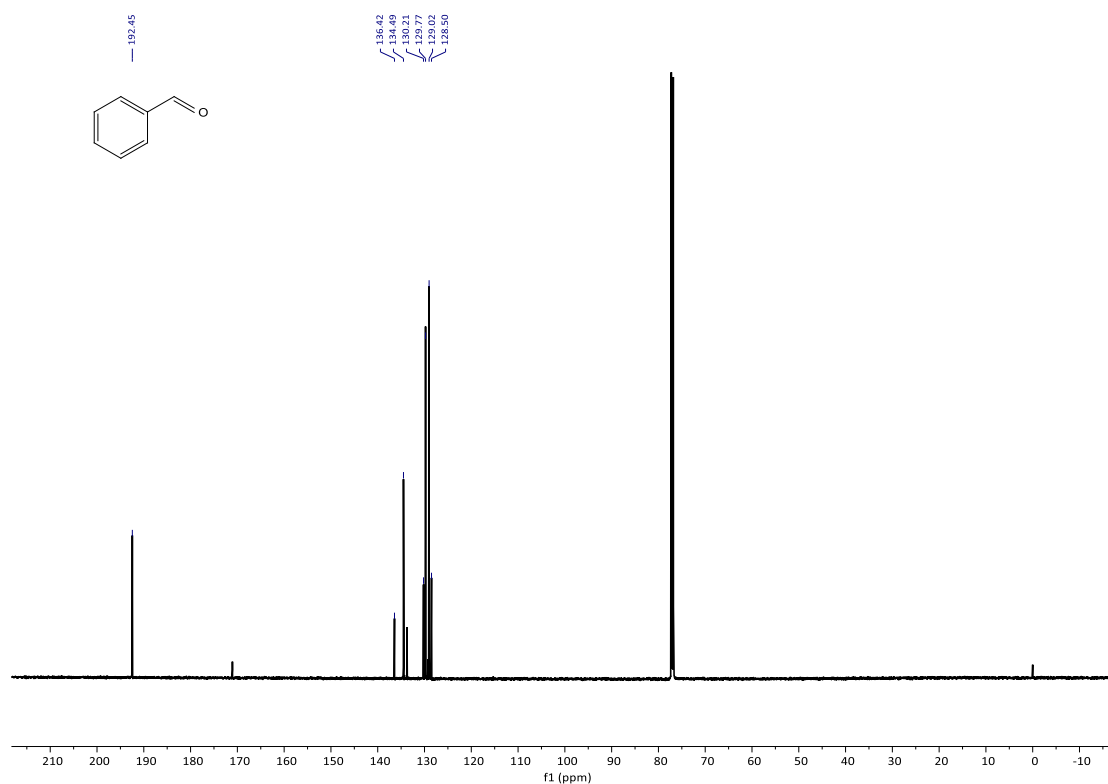

<sup>13</sup>C NMR spectrum of compound 2 (151 MHz, CDCl<sub>3</sub>).

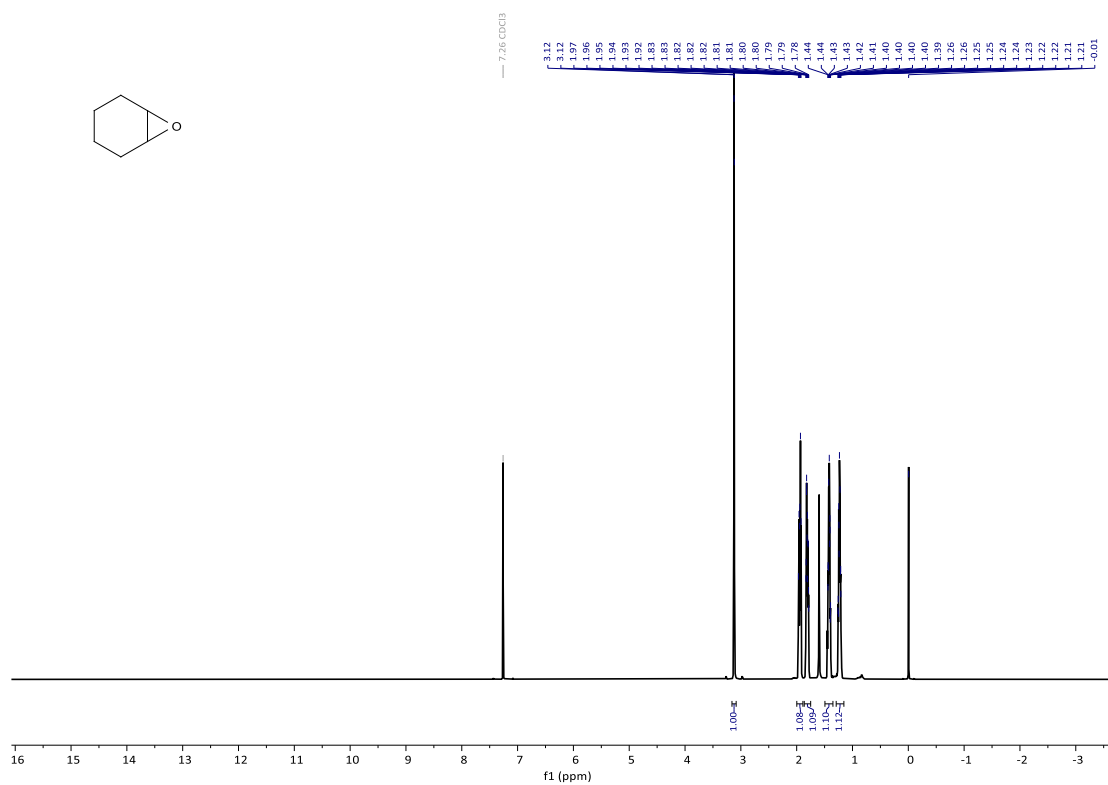

<sup>1</sup>H NMR spectrum of compound 3 (600 MHz, CDCl<sub>3</sub>).

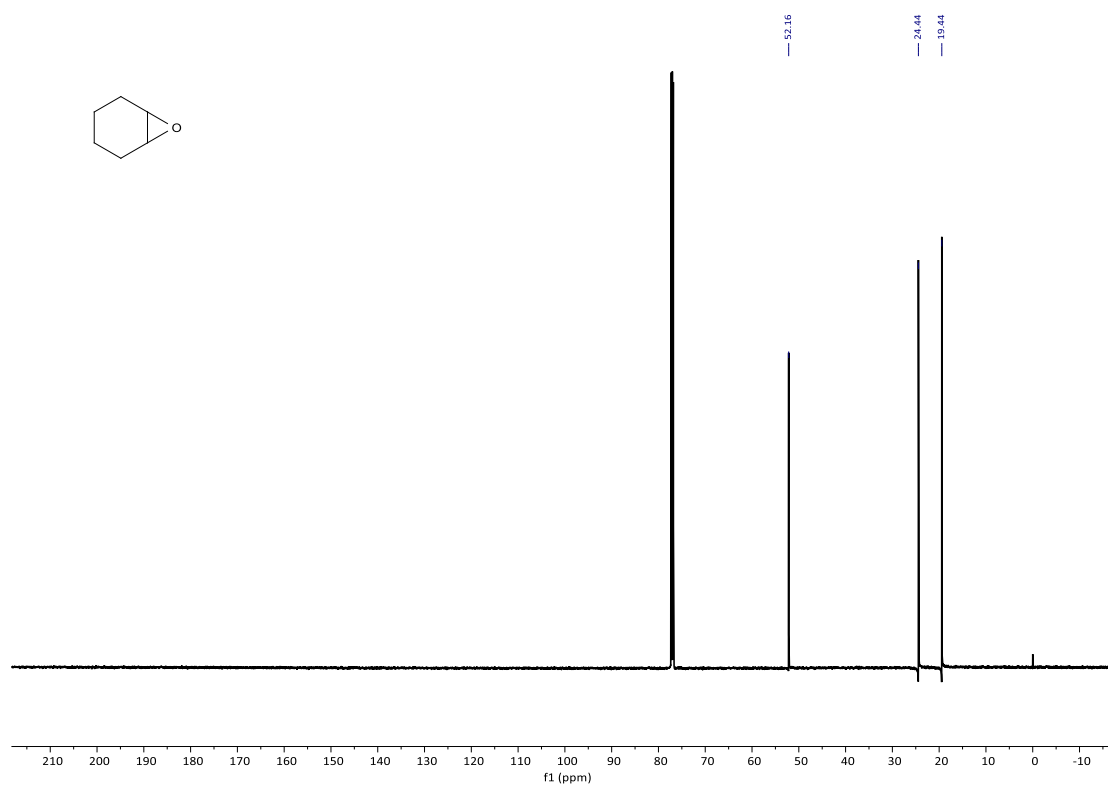

<sup>13</sup>C NMR spectrum of compound 3 (151 MHz, CDCl<sub>3</sub>).



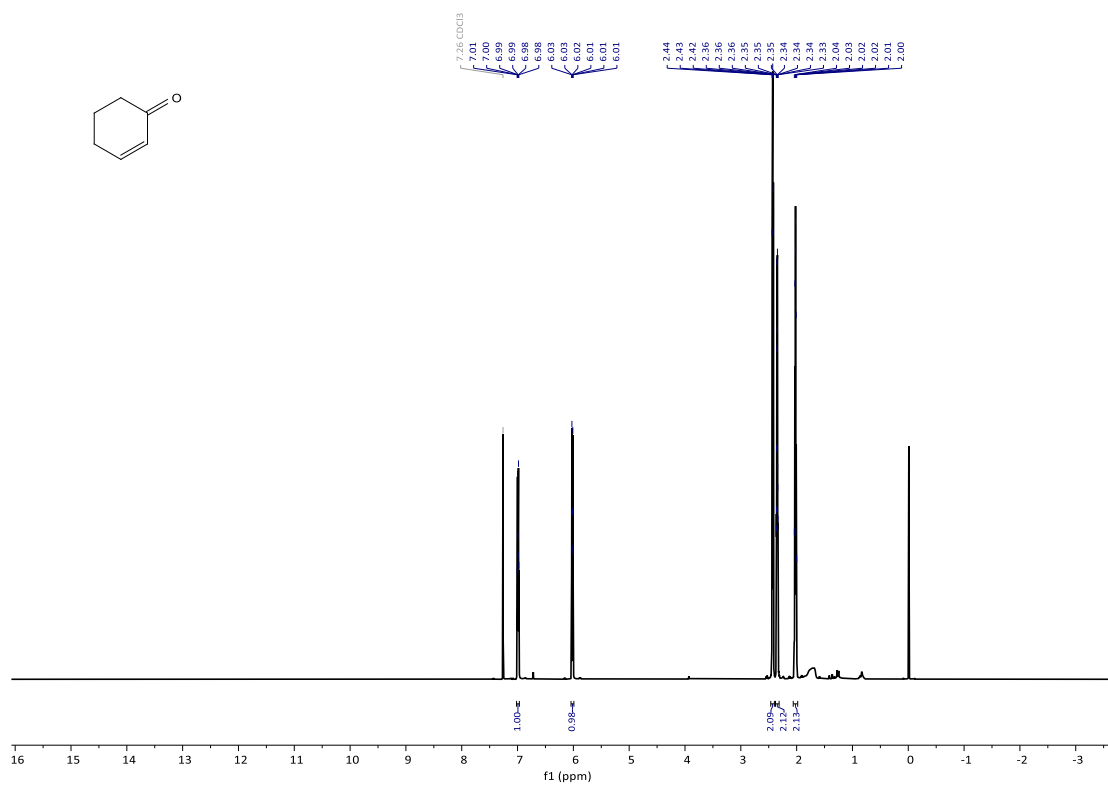

<sup>1</sup>H NMR spectrum of compound 5 (600 MHz, CDCl<sub>3</sub>).

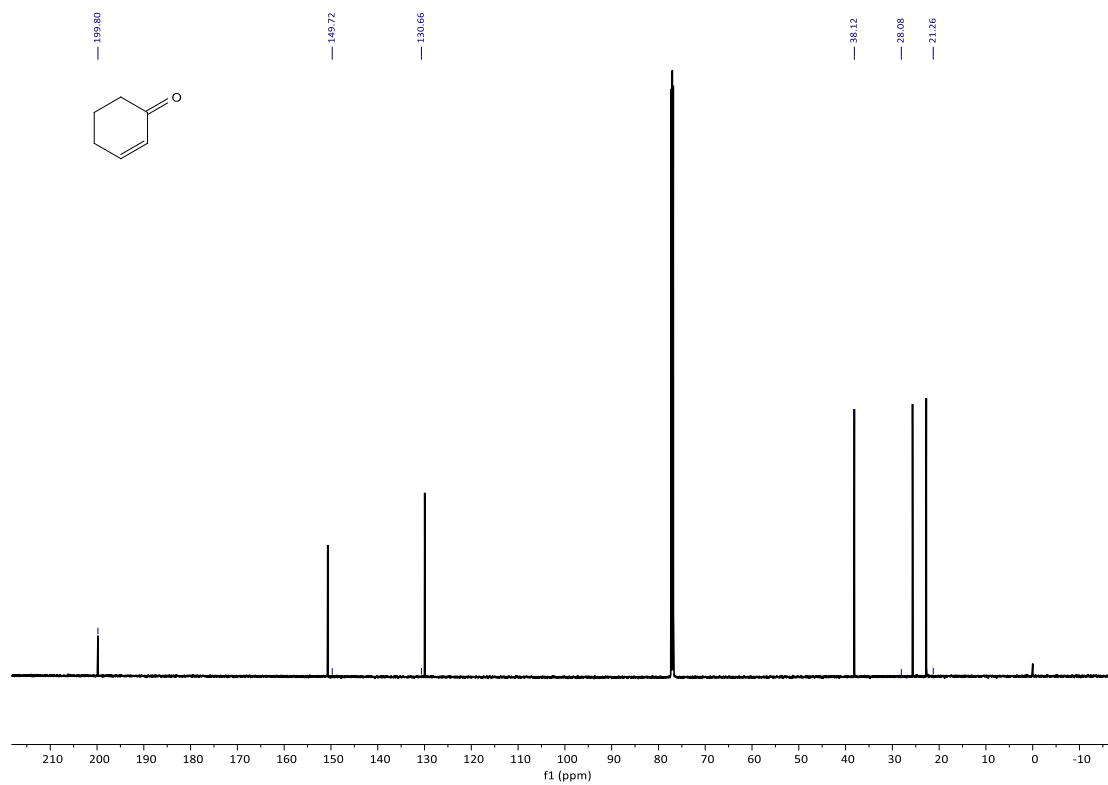

<sup>13</sup>C NMR spectrum of compound 5 (151 MHz, CDCl<sub>3</sub>).
